# Supplementary material for: G6-1.5K-SAI and G6sulfur: changes in impacts and uncertainty depending on stratospheric aerosol injection strategy in the Geoengineering Model Intercomparison Project
Source: Copernicus journal article supplement (doi:10.5194/egusphere-2025-5742), 2025-11-21
Supplement: Supplementary file 1 [file egusphere-2025-5742-supplement.pdf]

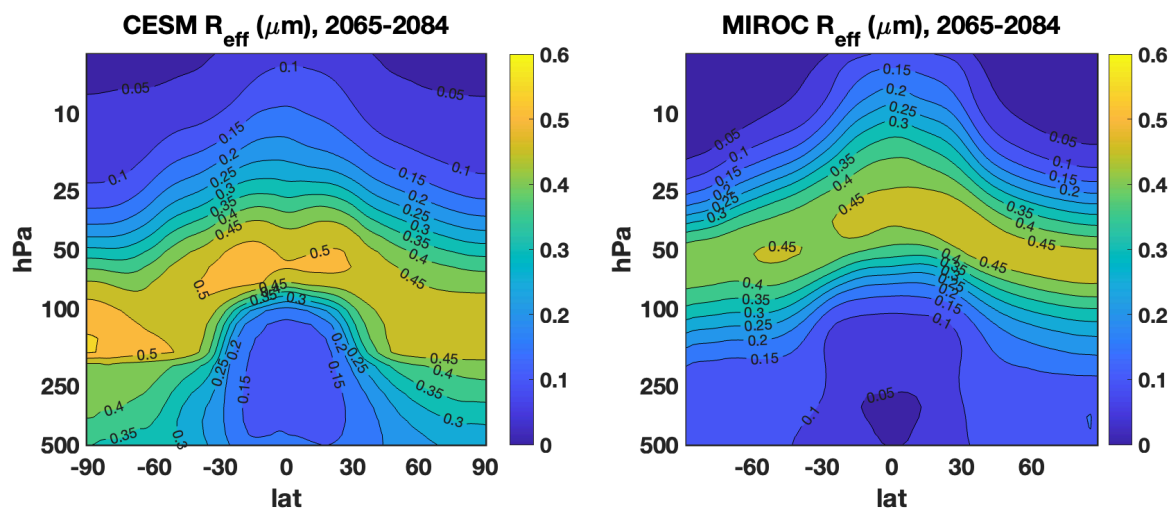

Figure S1: zonal means of wet effective aerosol radius, as output directly by the model, for CESM and MIROC. Data are averaged over the last 20 years (2065-2084) of G6-1.5K-SAI.

### ITCZ position (G6-1.5K-SAI models)

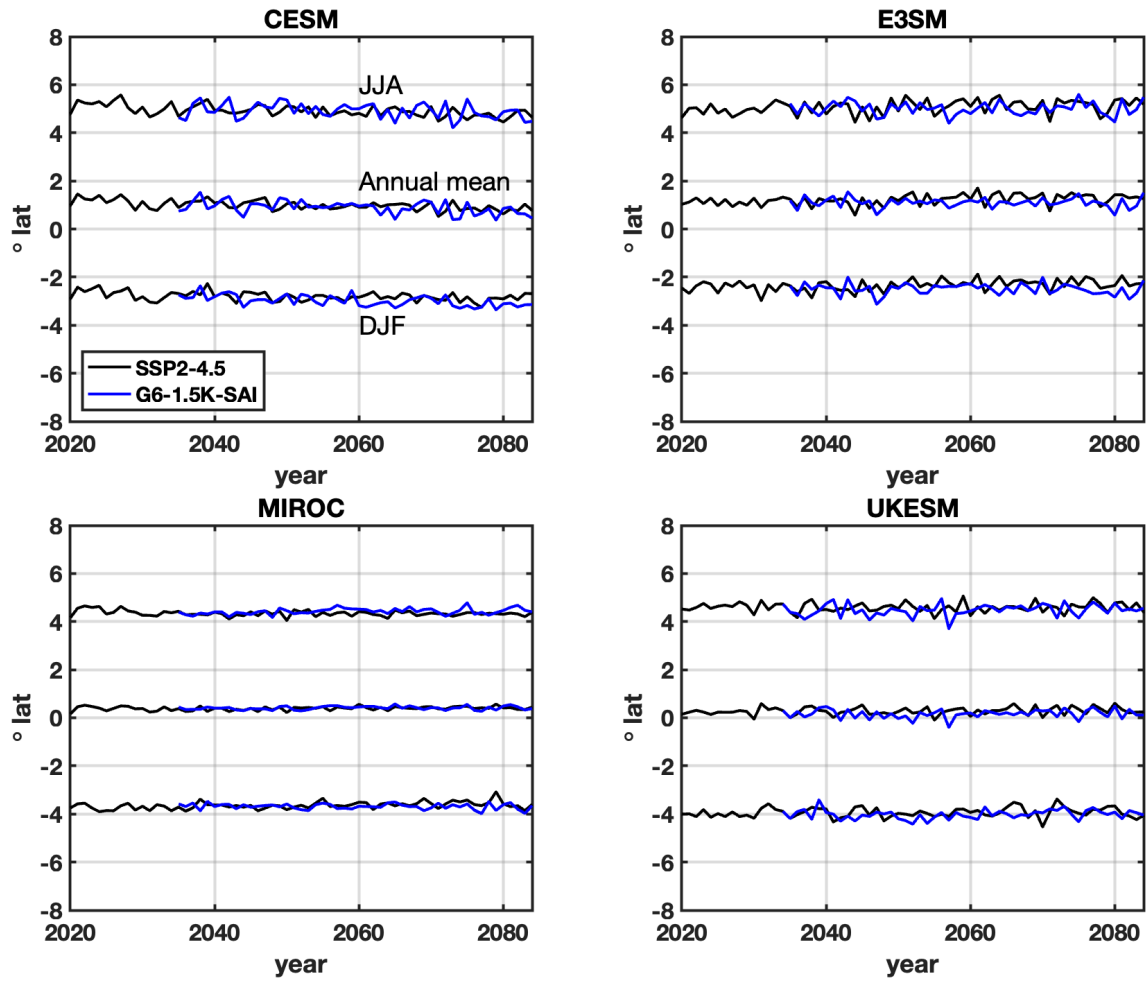

Figure S2: ITCZ position for G6-1.5K-SAI participating models. Summer (JJA, June-July-August), winter (DJF, December-January-February) and annual means are included as indicated, with JJA values in the northern hemisphere, annual mean values near the equator, and DJF values in the southern hemisphere.

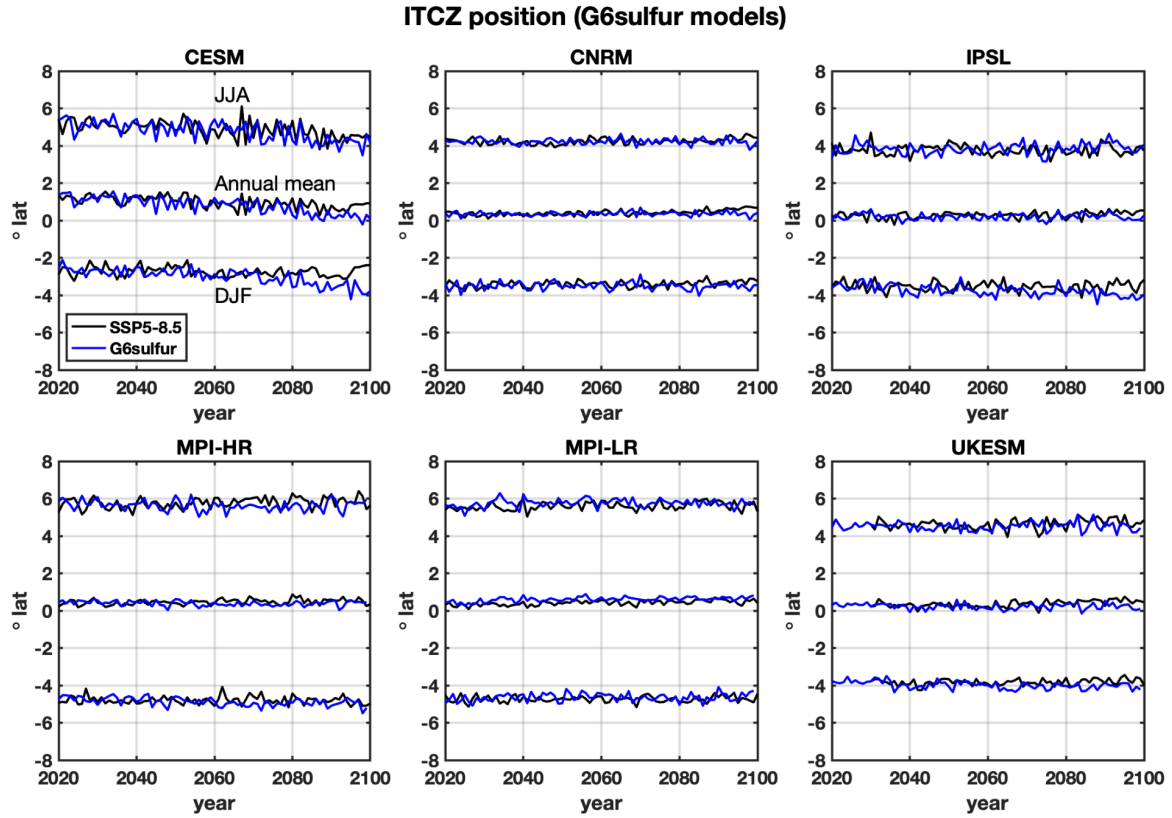

Figure S3: ITCZ position for G6sulfur participating models. Summer (JJA, June-July- August), winter (DJF, December-January-February) and annual means are included as indicated, with JJA values in the northern hemisphere, annual mean values near the equator, and DJF values in the southern hemisphere.
